# Supplementary material for: Ethnic inequalities among NHS staff in England: workplace experiences during the COVID-19 pandemic
Source: HighWire-hosted journal article supplement (doi:10.1136/oemed-2023-108976), 2024-02-20
Supplement: oemed-2023-108976supp001_data_supplement.pdf [file oemed-2023-108976supp001_data_supplement.pdf]

## **Ethnic inequalities experienced by NHS staff in England during the COVID-19 pandemic: Supplementary Material**

|                                                                                         |   |
|-----------------------------------------------------------------------------------------|---|
| Supplementary Material A: List of participating NHS Trusts .....                        | 2 |
| Supplementary Material B: Census grouping of ethnicities .....                          | 3 |
| Supplementary Material C: Sample composition comparison.....                            | 4 |
| Supplementary Material D: Understanding Employee Rights.....                            | 5 |
| Supplementary Material E: Subgroup analyses .....                                       | 6 |
| Supplementary Tables: Table 3 and Table 4 (with both crude and adjusted estimates)..... | 7 |
| Supplementary Figure: Survey Timeline .....                                             | 9 |

## Supplementary Material A: List of participating NHS Trusts

The following NHS Trust participated in the NHCHECK study.

---

**Trust names**

---

Avon & Wiltshire Mental Health Partnership NHS Trust

---

Cambridge University Hospitals NHS Foundation Trust

---

Cambridgeshire and Peterborough NHS Trust

---

Cornwall Partnership Trust

---

Devon Partnership NHS Trust

---

East Suffolk and North Essex NHS Trust

---

Gloucestershire Hospitals NHS Trust

---

Guy's and St Thomas' NHS Trust

---

King's College Hospital and PRUH

---

Lancashire and South Cumbria NHS Trust

---

Norfolk and Norwich University Hospitals

---

Nottinghamshire Healthcare NHS Trust

---

Royal Papworth Hospital

---

Sheffield Health and Social Care NHS Foundation Trust

---

South London and Maudsley (SLAM)

---

Tees Esk and Wear Valleys NHS Foundation Trust

---

University Hospitals of Derby and Burton

---

University Hospitals of Leicester NHS Trust

---

## Supplementary Material B: Census grouping of ethnicities

---

### Asian or Asian British

- Indian
- Pakistani
- Bangladeshi
- Chinese
- Any other Asian background

### Black, Black British, Caribbean, or African

- Caribbean
- African
- Any other Black, Black British, or Caribbean background

### Mixed or multiple ethnic groups

- White and Black Caribbean
- White and Black African
- White and Asian
- Any other Mixed or multiple ethnic background

### White

- English, Welsh, Scottish, Northern Irish or British
- Irish
- Gypsy or Irish Traveller
- Roma
- Any other White background

### Other ethnic group

- Arab
  - Any other ethnic group
-

### Supplementary Material C: Sample composition comparison

|                          | Baseline<br>(N = 22,834) | Inequalities Survey<br>(N = 4,622) |
|--------------------------|--------------------------|------------------------------------|
| <b>Ethnicity</b>         |                          |                                    |
| White British            | 18,127 (79%)             | 3,741 (81%)                        |
| White Other              | 1,446 (6%)               | 392 (9%)                           |
| Black                    | 991 (4%)                 | 136 (3%)                           |
| Asian                    | 1,503 (7%)               | 220 (5%)                           |
| Mixed/Other              | 767 (3%)                 | 133 (3%)                           |
| <b>Gender</b>            |                          |                                    |
| female                   | 18,487 (81%)             | 3,725 (81%)                        |
| male                     | 4,232 (19%)              | 825 (18%)                          |
| other                    | 109 (1%)                 | 72 (2%)                            |
| <b>Age group (years)</b> |                          |                                    |
| ≤30                      | 4,367 (20%)              | 645 (14%)                          |
| 31-40                    | 5,068 (23%)              | 923 (20%)                          |
| 41-50                    | 5,794 (26%)              | 1,290 (28%)                        |
| 51+                      | 6,850 (31%)              | 1,764 (38%)                        |
| Unweighted %             |                          |                                    |

## Supplementary Material D: Understanding Employee Rights

### Regression to show associations between ethnicity and understanding employee rights

|                                                                                                       | n(%)          | Crude OR<br>[95%CI] | Adjusted OR<br>[95%CI] |
|-------------------------------------------------------------------------------------------------------|---------------|---------------------|------------------------|
| White British                                                                                         | 1,504 (46.3%) | —                   | —                      |
| White Other                                                                                           | 156 (44.8%)   | 0.94 [0.70, 1.26]   | 0.94 [0.69, 1.28]      |
| Black                                                                                                 | 39 (34.8%)    | 0.62 [0.40, 0.96]   | 0.52 [0.32, 0.85]      |
| Asian                                                                                                 | 68 (37.5%)    | 0.70 [0.44, 1.11]   | 0.89 [0.56, 1.40]      |
| Mixed/Other                                                                                           | 50 (27.2%)    | 0.43 [0.20, 0.92]   | 0.49 [0.23, 1.06]      |
| <i>Adjusted models adjust for age, sex, region, contract, job role and month of survey completion</i> |               |                     |                        |

## Supplementary Material E: Subgroup analyses

### Subgroup analysis of probable depression by ethnicity, stratified by BHA and discrimination

|                                     | No BHA<br>n (%) | BHA<br>n (%) | No Discrimination<br>n (%) | Discrimination<br>n (%) |
|-------------------------------------|-----------------|--------------|----------------------------|-------------------------|
| <b>Probable depressive disorder</b> |                 |              |                            |                         |
| White British                       | 350 (15.6)      | 337 (34.4)   | 467 (17.4)                 | 220 (42.9)              |
| White Other                         | 35 (18.0)       | 48 (39.2)    | 50 (19.3)                  | 33 (44.5)               |
| Black                               | 14 (21.7)       | 15 (25.6)    | 13 (18.1)                  | 16 (30.1)               |
| Asian                               | 22 (14.1)       | 25 (37.1)    | 23 (13.8)                  | 24 (45.2)               |
| Mixed/Other                         | 12 (22.8)       | 15 (46.8)    | 12 (19.2)                  | 15 (55.7)               |

BHA = Bullying, Harassment or Abuse

Probable depressive disorder = PHQ-9 score of  $\geq 10$

### Supplementary Tables: Table 3 and Table 4 (with both crude and adjusted estimates)

**Supplementary Table 3: Regression analysis to show associations between ethnicity and redeployment experiences in those who were redeployed (n=1,123) [BOTH CRUDE AND ADJUSTED ESTIMATES]**

| Ethnicity     | Able to challenge redeployment |                      |                        | Warned about redeployment |                      |                        | Able to have a say (input) about redeployment |                      |                        |
|---------------|--------------------------------|----------------------|------------------------|---------------------------|----------------------|------------------------|-----------------------------------------------|----------------------|------------------------|
|               | n (%)                          | Crude OR<br>[95%CI]  | Adjusted OR<br>[95%CI] | n (%)                     | Crude OR<br>[95%CI]  | Adjusted OR<br>[95%CI] | n (%)                                         | Crude OR<br>[95%CI]  | Adjusted OR<br>[95%CI] |
| White British | 508 (50.6)                     | —                    | —                      | 650 (70.3)                | —                    | —                      | 489 (51.1)                                    | —                    | —                      |
| White Other   | 66 (56.9)                      | 1.29<br>[0.81, 2.06] | 1.07<br>[0.65, 1.76]   | 76 (67.3)                 | 0.87<br>[0.53, 1.43] | 0.74<br>[0.42, 1.30]   | 59 (49.4)                                     | 0.93<br>[0.59, 1.49] | 0.70<br>[0.44, 1.12]   |
| Black         | 15 (42.5)                      | 0.72<br>[0.34, 1.52] | 0.58<br>[0.28, 1.20]   | 20 (62.1)                 | 0.69<br>[0.32, 1.49] | 0.68<br>[0.31, 1.53]   | 12 (31.5)                                     | 0.44<br>[0.20, 0.95] | 0.33<br>[0.15, 0.72]   |
| Asian         | 35 (72.4)                      | 2.56<br>[1.29, 5.08] | 3.17<br>[1.26, 7.99]   | 41 (75.3)                 | 1.29<br>[0.60, 2.74] | 1.46<br>[0.59, 3.62]   | 35 (68.5)                                     | 2.08<br>[1.03, 4.20] | 2.38<br>[0.95, 5.97]   |
| Mixed/Other   | 15 (23.2)                      | 0.30<br>[0.09, 0.95] | 0.37<br>[0.14, 0.94]   | 21 (32.2)                 | 0.20<br>[0.06, 0.68] | 0.23<br>[0.09, 0.58]   | 18 (30.6)                                     | 0.42<br>[0.13, 1.41] | 0.52<br>[0.21, 1.33]   |

*Adjusted models adjust for age, sex, region, contract, job role and month of survey completion*

**Supplementary Table 4: Regression analysis to show associations between workplace experiences and mental and physical health outcomes [BOTH CRUDE AND ADJUSTED ESTIMATES]**

| Workplace Experience                                          | n (%) | Probable Depression<br>(PHQ-9 score $\geq 10$ ) |                        | n (%)                | Probable Anxiety<br>(GAD-7 score $\geq 8$ ) |                        | n (%)                | Moderate/Severe Somatic Symptoms<br>(PHQ-15 score $\geq 10$ ) |                        |                      |
|---------------------------------------------------------------|-------|-------------------------------------------------|------------------------|----------------------|---------------------------------------------|------------------------|----------------------|---------------------------------------------------------------|------------------------|----------------------|
|                                                               |       | Crude OR<br>[95%CI]                             | Adjusted OR<br>[95%CI] |                      | Crude OR<br>[95%CI]                         | Adjusted OR<br>[95%CI] |                      | Crude OR<br>[95%CI]                                           | Adjusted OR<br>[95%CI] |                      |
| Unavailable PPE                                               | Yes   | 192 (35.9)                                      | 2.15<br>[1.62, 2.87]   | 2.01<br>[1.52, 2.66] | 136 (27.5)                                  | 2.01<br>[1.44, 2.80]   | 1.73<br>[1.26, 2.36] | 1,380 (34.0)                                                  | 1.90<br>[1.42, 2.54]   | 1.90<br>[1.43, 2.54] |
|                                                               | No    | 568 (20.6)                                      | —                      | —                    | 428 (15.9)                                  | —                      | —                    | 3,907 (21.0)                                                  | —                      | —                    |
| Risk assessment                                               | Yes   | 627 (22.2)                                      | 0.81<br>[0.63, 1.04]   | 0.86<br>[0.67, 1.10] | 450 (16.8)                                  | 0.80<br>[0.60, 1.06]   | 0.82<br>[0.62, 1.08] | 674 (22.4)                                                    | 0.77<br>[0.59, 0.99]   | 0.80<br>[0.62, 1.04] |
|                                                               | No    | 236 (26.0)                                      | —                      | —                    | 184 (20.2)                                  | —                      | —                    | 242 (27.3)                                                    | —                      | —                    |
| Discrimination                                                | Yes   | 304 (43.8)                                      | 3.59<br>[2.79, 4.62]   | 3.65<br>[2.83, 4.70] | 226 (34.8)                                  | 3.45<br>[2.61, 4.56]   | 3.67<br>[2.79, 4.83] | 309 (41.8)                                                    | 3.10<br>[2.42, 3.98]   | 2.99<br>[2.33, 3.85] |
|                                                               | No    | 567 (17.8)                                      | —                      | —                    | 416 (13.4)                                  | —                      | —                    | 613 (18.8)                                                    | —                      | —                    |
| BHA                                                           | Yes   | 436 (35.7)                                      | 2.84<br>[2.26, 3.55]   | 3.02<br>[2.42, 3.77] | 341 (28.7)                                  | 2.97<br>[2.31, 3.81]   | 3.31<br>[2.58, 4.25] | 461 (36.5)                                                    | 2.88<br>[2.31, 3.59]   | 3.00<br>[2.40, 3.75] |
|                                                               | No    | 435 (16.4)                                      | —                      | —                    | 301 (11.9)                                  | —                      | —                    | 461 (16.6)                                                    | —                      | —                    |
| Redeployed                                                    | Yes   | 255 (23.4)                                      | 1.02<br>[0.80, 1.30]   | 0.97<br>[0.76, 1.24] | 190 (18.4)                                  | 1.09<br>[0.82, 1.43]   | 1.00<br>[0.76, 1.32] | 260 (24.0)                                                    | 1.05<br>[0.82, 1.33]   | 0.98<br>[0.76, 1.26] |
|                                                               | No    | 607 (22.9)                                      | —                      | —                    | 444 (17.2)                                  | —                      | —                    | 655 (23.2)                                                    | —                      | —                    |
| Understand redeployment rights                                | Yes   | 320 (18.5)                                      | 0.62<br>[0.50, 0.77]   | 0.66<br>[0.53, 0.83] | 232 (14.6)                                  | 0.68<br>[0.53, 0.88]   | 0.77<br>[0.60, 1.00] | 350 (18.3)                                                    | 0.59<br>[0.47, 0.73]   | 0.62<br>[0.50, 0.77] |
|                                                               | No    | 541 (26.8)                                      | —                      | —                    | 402 (20.0)                                  | —                      | —                    | 561 (27.6)                                                    | —                      | —                    |
| Able to challenge redeployment (if redeployed)                | Yes   | 121 (19.2)                                      | 0.62<br>[0.42, 0.92]   | 0.70<br>[0.48, 1.04] | 83 (14.3)                                   | 0.57<br>[0.35, 0.91]   | 0.68<br>[0.42, 1.12] | 114 (18.5)                                                    | 0.53<br>[0.35, 0.80]   | 0.61<br>[0.41, 0.91] |
|                                                               | No    | 134 (27.8)                                      | —                      | —                    | 107 (22.7)                                  | —                      | —                    | 146 (29.9)                                                    | —                      | —                    |
| Warned about redeployment (if redeployed)                     | Yes   | 156 (18.9)                                      | 0.47<br>[0.30, 0.73]   | 0.53<br>[0.35, 0.79] | 119 (15.7)                                  | 0.58<br>[0.35, 0.97]   | 0.72<br>[0.44, 1.17] | 158 (20.1)                                                    | 0.51<br>[0.33, 0.80]   | 0.58<br>[0.38, 0.88] |
|                                                               | No    | 99 (33.2)                                       | —                      | —                    | 71 (24.3)                                   | —                      | —                    | 102 (32.9)                                                    | —                      | —                    |
| Able to have a say (input) about redeployment (if redeployed) | Yes   | 122 (18.3)                                      | 0.56<br>[0.38, 0.83]   | 0.64<br>[0.43, 0.95] | 87 (14.4)                                   | 0.58<br>[0.36, 0.93]   | 0.70<br>[0.43, 1.16] | 117 (17.9)                                                    | 0.50<br>[0.33, 0.75]   | 0.56<br>[0.38, 0.83] |
|                                                               | No    | 133 (28.6)                                      | —                      | —                    | 103 (22.5)                                  | —                      | —                    | 143 (30.4)                                                    | —                      | —                    |

Adjusted models adjust for age, sex, region, contract, job role and month of survey completion

PPE = Personal Protective Equipment

BHA = Bullying, Harassment or Abuse



## Supplementary Figure: Survey Timeline

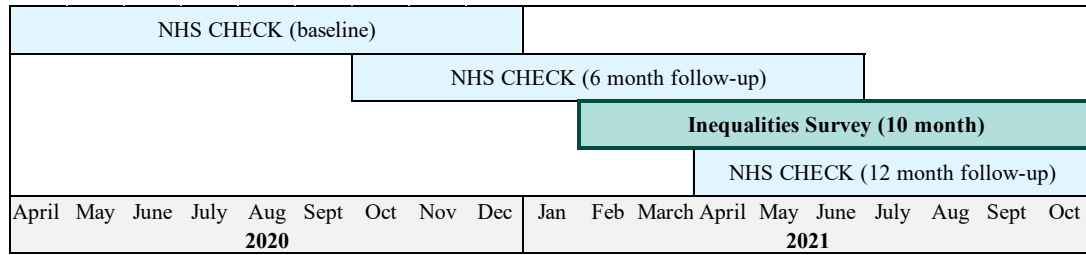

**Supplementary Figure: Timelines for the TIDES Inequalities Survey alongside NHS CHECK surveys**
